# Supplementary material for: Evolutionary Dynamics of Foot and Mouth Disease Virus Serotype A and Its Endemic Sub-Lineage A/ASIA/Iran-05/SIS-13 in Pakistan
Source: MDPI journal article supplement (doi:10.3390/v14081634), 2022-07-26
Supplement: s1 [file s1]

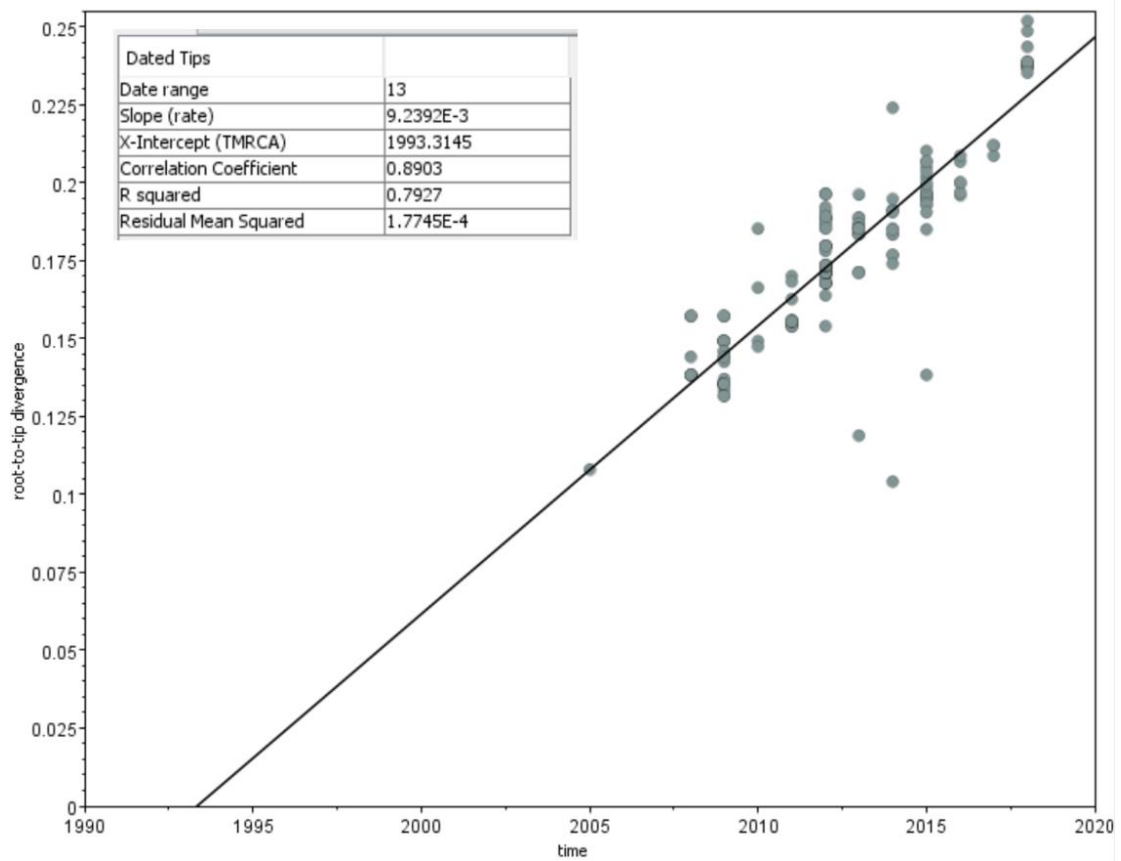

**Figure S1. Regression plot of root-to-tip divergence with time in years.** The unrooted, maximum-likelihood tree generated in IQtree was visualized in TempEst for temporal signal. Best-fitting root was selected for the tree and the heuristic residual mean squared function was used for regression analysis of divergence with time. R squared value 0.79 showed a good fit of the regression model and hinted at a strong temporal signal in sequence data.

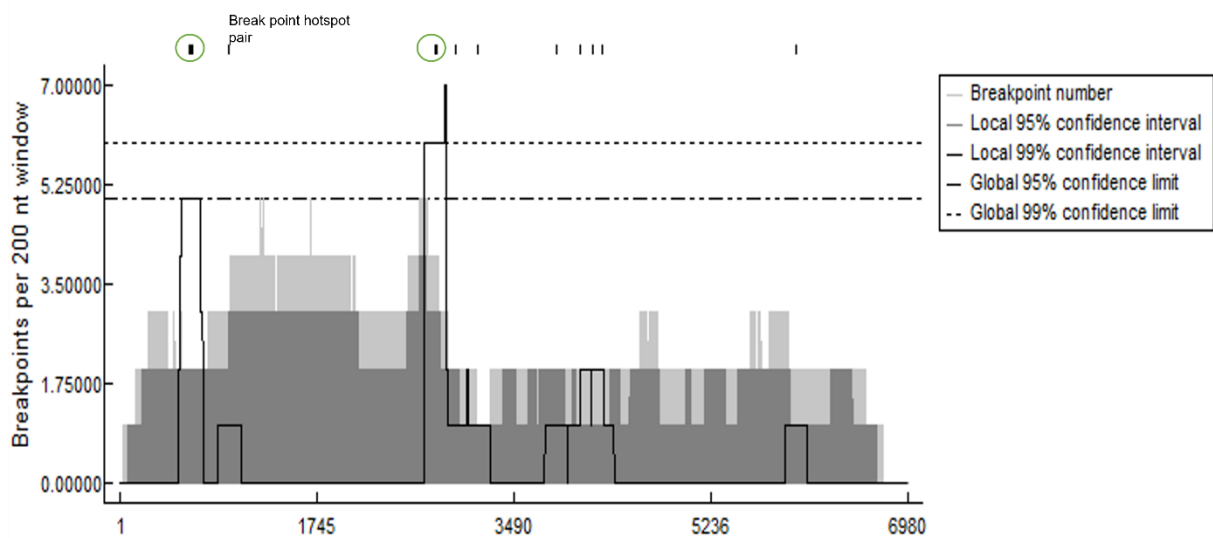

**Figure S2. Recombination Breakpoints position inferred for complete genome sequences of three serotypes O, A, and Asia1 of FMDV in RDP4.** The breakpoint hot spot pair indicates if a breakpoint has occurred at ~ 900 positions then the other will occur at ~ 2300. The area between these two breakpoints is seemingly a cold spot where recombination is less likely to occur.

**Table S1.** List of accession numbers of complete genome sequences of type A, O, and Asia-1 from Pakistan, available in NCBI GenBank.

| Accession # | Isolate ID                         |
|-------------|------------------------------------|
| OM455480.1  | A/PAK/ICT/1/2008/ESF-10            |
| OM455482.1  | A/PAK/KCH/7/2009/ESF-10            |
| KY446902.1  | A/Hafizabad/QOL-UVAS-Pak/2005      |
| MN062587.1  | A/SIN/PAK/L693/2009/BAR-08         |
| EF494487.1  | A/isolate/PAK1/2006/Iran-05        |
| EF494488.1  | A/PAK5/2006                        |
| OM455476.1  | A/PAK/ICT/231-1/2012/HER-10        |
| OM455481.1  | A/PAK/ICT/276/2012/FAR-11          |
| OM455465.1  | A/PAK/ICT/7-3/2012/HER-10          |
| JN006722.1  | A/SIN/PAK/L4/2008/SIN-08           |
| OM455466.1  | A/PAK/ICT/008-3/2012/HER-10        |
| OM455477.1  | A/PAK/ICT/237-1/2012/HER-10        |
| OM455471.1  | A/PAK/ICT/168-3/2012/HER-10        |
| OM455467.1  | A/PAK/ICT/059-1/2012               |
| OM455472.1  | A/PAK/ICT/170-1/2012/HER-10        |
| OM455475.1  | A/PAK/ICT/229-1/2012/HER-10        |
| OM455474    | A/PAK/ICT/208-1/2012/HER-10        |
| OM455484    | A/PAK/SGD/12/2012/HER-10           |
| OM455483.1  | A/PAK/PSH/34/2012/HER-10           |
| OM455479.1  | A/PAK/FSD/4/2012/HER-10            |
| OM455478.1  | A/PAK/ICT/238-1/2012/HER-10        |
| OM455473.1  | A/PAK/ICT/177-4/2012/HER-10        |
| OM455468.1  | A/PAK/ICT/131-4/2012/HER-10        |
| OM455469.1  | A/PAK/ICT/149-4/2012/HER-10        |
| OM455470.1  | A/PAK/ICT/168-2/2012/HER-10        |
| MZ493233.1  | FMDV/A/ASIA/Iran-05/SIS-13         |
| MZ493234.1  | FMDV/A/ASIA/Iran-05/SIS-13         |
| MZ493232.1  | FMDV/A/ASIA/Iran-05/SIS-13         |
| MN062587.1  | FMDV/O/SIN/PAK/L693/2009           |
| GU384683.1  | FMDV/O/PAK/45/2008                 |
| JN006719.1  | As/SIN/PAK/L5/2008                 |
| JN006720.1  | As/SIN/PAK/L2810/2008              |
| KT003716.1  | FMDV/O/ Nari/UVAS-Pak/2005         |
| KY446901.1  | FMDV/Asia1/Mazbi/QOL-UVAS-Pak/2006 |
| KY446903.1  | FMDV/O/FBD/QOL-UVAS-Pak/2005       |
| MH784403.1  | FMDV/O/PAK/17/2017                 |
| MH784404.1  | FMDV/O/PAK/4/2017                  |
| MH784405.1  | FMDV/O/PAK/14/2017                 |
| MN062581.1  | FMDV/ O/PUN/PAK/L1358/2009         |
| MN062582.1  | FMDV/O/PUN/PAK/L1370/2009          |
| MN062583.1  | FMDV/O/ISL/PAK/L1412/2009          |
| MN062584.1  | FMDV/O/NWF/PAK/L1417/2009          |
| MN062587.1  | FMDV/A/SIN/PAK/L693/2009           |
| MN953619.1  | FMDV/O/PAK/1/2019                  |
| MN953620.1  | FMDV/O/PAK/2/2019                  |
| AY593795.1  | FMDV/asia1-1/pak iso3/1954         |
